# Supplementary material for: First observation of mutual energy transfer of Mn4+–Er3+via different excitation in Gd2ZnTiO6:Mn4+/Er3+phosphors
Source: Royal Society of Chemistry journal article supplement (doi:10.1039/c7tc03045b), 2017-01-01
Supplement: c7tc03045b1.pdf [file c7tc03045b1.pdf]

## ***Supporting Information***

### **First observation of mutual energy transfer of Mn<sup>4+</sup>-Er<sup>3+</sup> via different excitation in Gd<sub>2</sub>ZnTiO<sub>6</sub>:Mn<sup>4+</sup>/Er<sup>3+</sup> phosphors**

Jinsheng Liao<sup>\*a</sup>, Qi Wang<sup>a</sup>, He-Rui Wen<sup>\*a</sup>, Huali Yuan<sup>a</sup>, Sui-Jun Liu<sup>a</sup> Junxiang Fu<sup>a</sup>,  
and Bao Qiu<sup>\*b</sup>

*<sup>a</sup>School of Metallurgical and Chemical Engineering, Jiangxi University of Science and  
Technology, Ganzhou, Jiangxi 341000, P. R. China*

*\*E-mail: [jsliao1209@126.com](mailto:jsliao1209@126.com) (J.S. Liao); [wenherui63@163.com](mailto:wenherui63@163.com) (H.-R Wen)*

*<sup>b</sup>Advanced Li-ion Battery Engineering Laboratory and Key Laboratory of Graphene Technologies  
and Applications of Zhejiang Province, Ningbo Institute of Materials Technology & Engineering  
(NIMTE), Chinese Academy of Sciences, Ningbo, Zhejiang, 315201, P. R. China*

*\*E-mail: [qiubao@nimte.ac.cn](mailto:qiubao@nimte.ac.cn) (B. Qiu)*

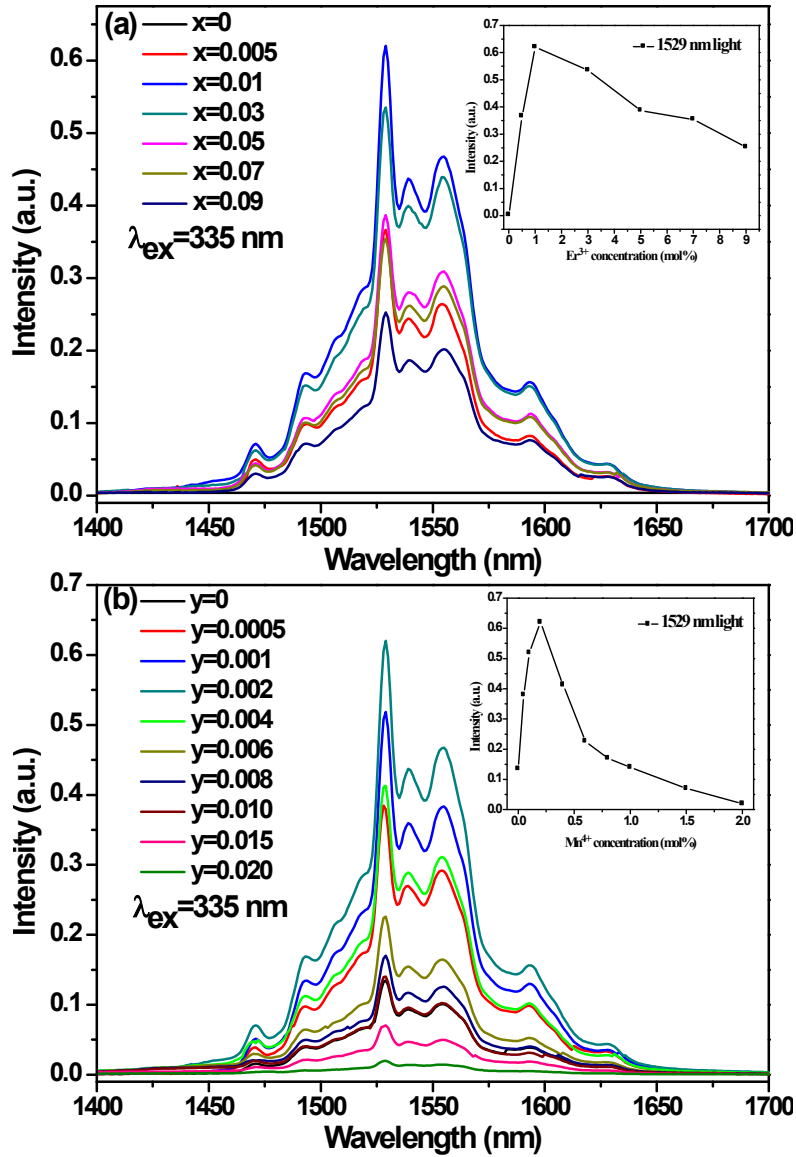

**Fig. S1** NIR emission spectra of (a)  $\text{Gd}_{2(1-x)}\text{ZnTi}_{0.998}\text{O}_6:\text{Mn}_{0.002}, \text{Er}_{2x}$  ( $x = 0, 0.005, 0.01, 0.03, 0.05, 0.07, 0.09$ ) and (b)  $\text{Gd}_{1.98}\text{ZnTi}_{1-y}\text{O}_6:\text{Mn}_y, \text{Er}_{0.02}$  ( $y = 0, 0.0005, 0.001, 0.002, 0.004, 0.006, 0.008, 0.01, 0.015, 0.02$ ) excited at 335 nm light. The inset shows the  $\text{Er}^{3+}$  and  $\text{Mn}^{4+}$  concentration dependent 1529 nm intensity of  $\text{Er}^{3+}$ .

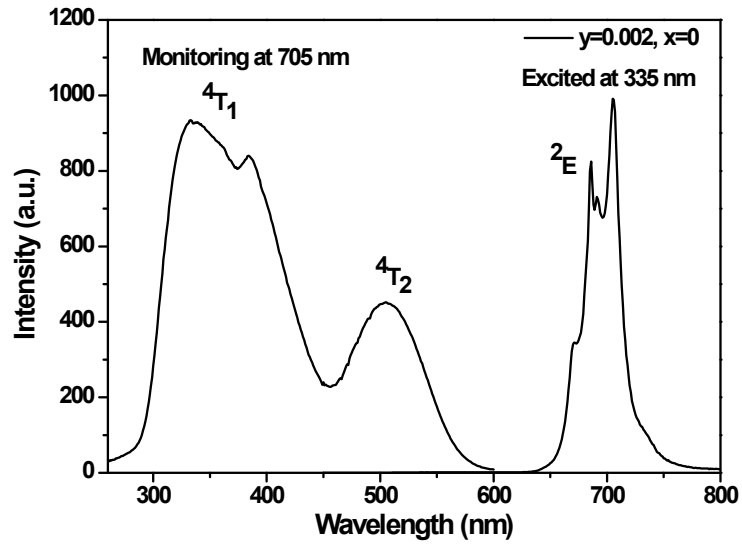

Fig. S2 Excitation and emission spectra of the  $\text{Mn}^{4+}$  single-doped GZT sample.

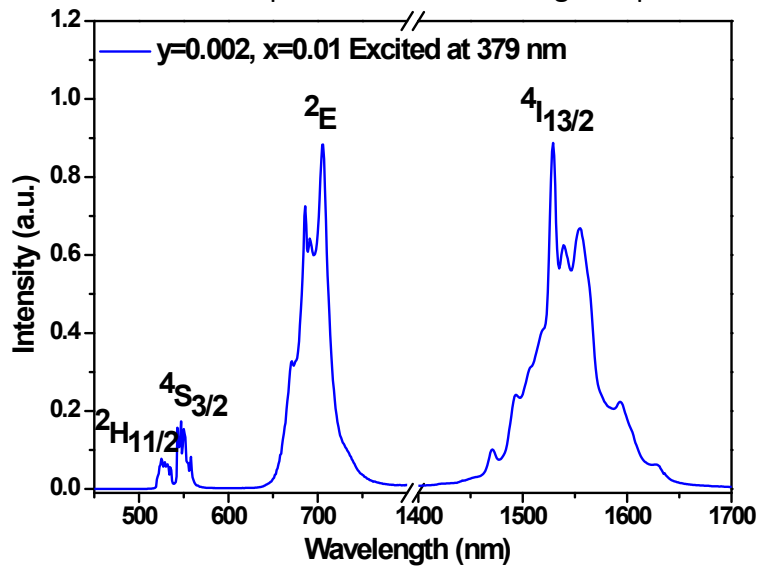

Fig. S3 The typical  $\text{Mn}^{4+}$  and  $\text{Er}^{3+}$  emission spectra of  $\text{GZT}:0.002\text{Mn}^{4+}/0.02\text{Er}^{3+}$  under common excitation wavelength 379 nm (corresponding to the  ${}^4\text{A}_2 \rightarrow {}^4\text{T}_1$  of  $\text{Mn}^{4+}$  and  ${}^4\text{I}_{15/2} \rightarrow {}^4\text{G}_{11/2}$  of  $\text{Er}^{3+}$ ).

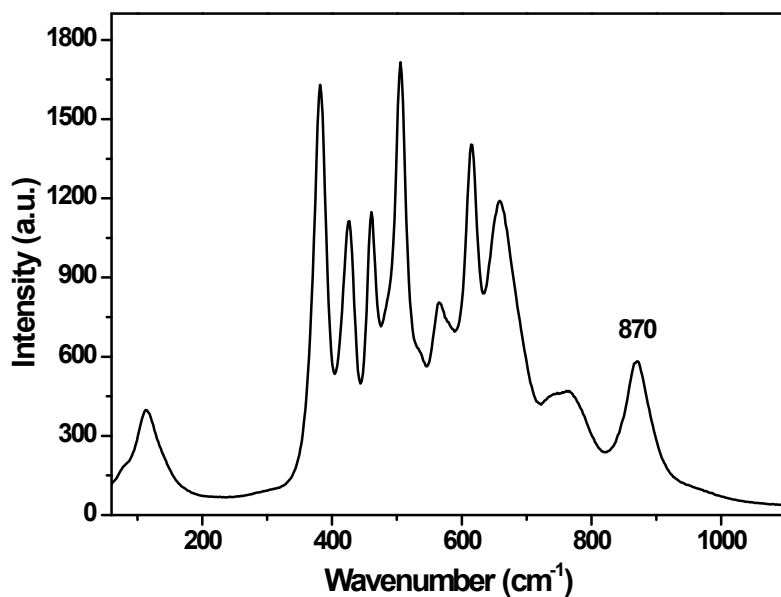

Fig. S4 Raman spectra of the GZT matrix

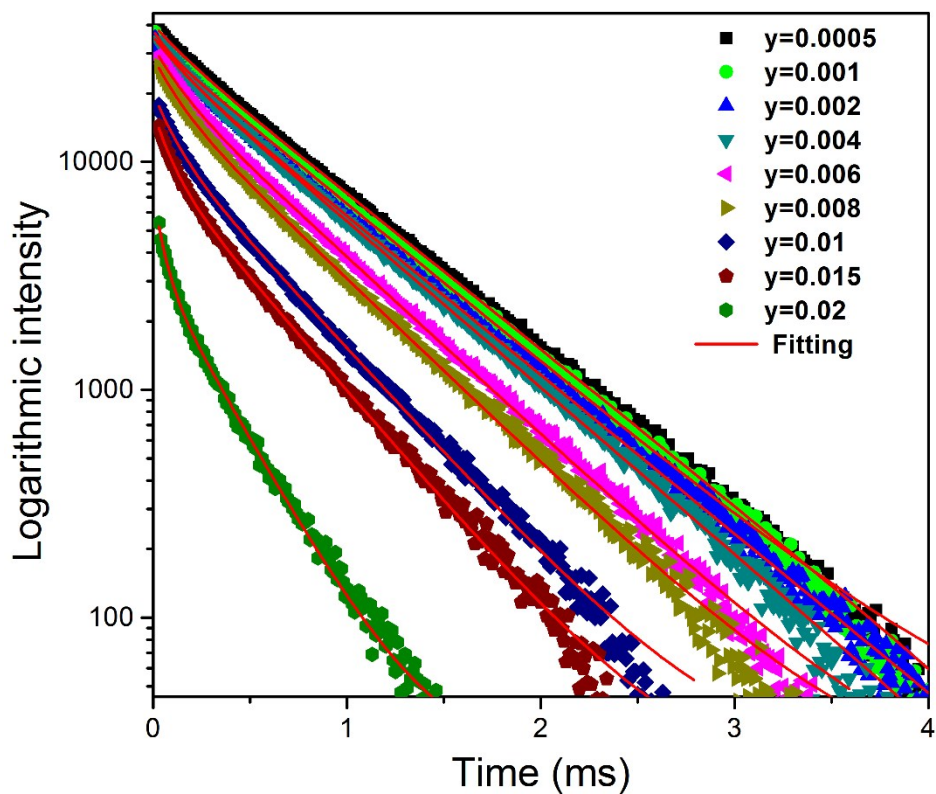

Fig. S5 Decay curves of Mn<sup>4+</sup> luminescence in GZT: 0.002Mn<sup>4+</sup>, 0.02Er<sup>3+</sup> ( $y = 0.0005, 0.001, 0.002, 0.004, 0.006, 0.008, 0.01, 0.015, 0.02$ ) monitored at 705 nm excited at 335 nm light

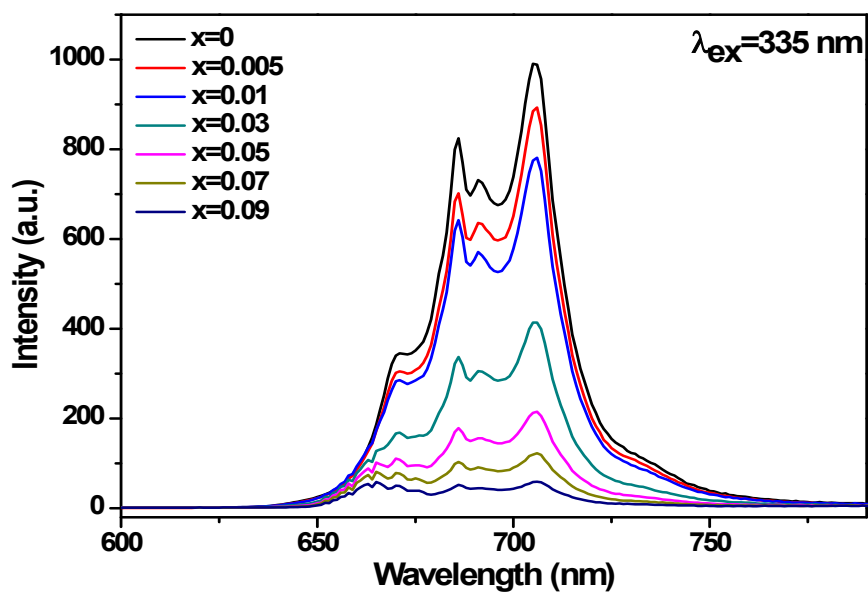

**Fig. S6** Emission spectra of  $\text{Mn}^{4+}$  in  $\text{Gd}_{2(1-x)}\text{ZnTi}_{0.998}\text{O}_6:0.002\text{Mn}^{4+}, 2x\text{Er}^{3+}$  ( $x = 0, 0.005, 0.01, 0.03, 0.05, 0.07, 0.09$ ) excited at 335 nm light.

**Table S1** Average lifetime ( $\tau$ ) of  $\text{Mn}^{4+}$  705 nm emission and the energy transfer efficiencies ( $\eta_{\text{ET}}$ ) from  $\text{Mn}^{4+}$  to  $\text{Er}^{3+}$  in  $\text{Gd}_{2(1-x)}\text{ZnTi}_{0.998}\text{O}_6:0.002\text{Mn}^{4+}, 2x\text{Er}^{3+}$  phosphors

| Er (x) | $A_1$         | $\tau_1$ (ms) | $A_2$         | $\tau_2$ (ms) | $\tau_{av}$ (ms) | $\eta_{\text{ET}}$ |
|--------|---------------|---------------|---------------|---------------|------------------|--------------------|
| 0      | 21928.10<br>1 | 0.701         | /             | /             | 0.701            | 0                  |
| 0.05   | 35732.45<br>8 | 0.677         | 2737.676      | 0.07          | 0.672            | 0.041              |
| 0.01   | 28787.43<br>4 | 0.623         | 6723.674      | 0.147         | 0.598            | 0.147              |
| 0.03   | 18249.24<br>4 | 0.496         | 16306.33<br>6 | 0.131         | 0.426            | 0.392              |
| 0.05   | 8737.664      | 0.388         | 17427.25<br>6 | 0.101         | 0.290            | 0.586              |
| 0.07   | 6241.655      | 0.288         | 16821.62<br>8 | 0.072         | 0.201            | 0.713              |
| 0.09   | 2895.307      | 0.216         | 11685.86<br>4 | 0.054         | 0.135            | 0.807              |

**Table S2** Average lifetime ( $\tau$ ) of Mn<sup>4+</sup> 705 nm emission in Gd<sub>1.98</sub>ZnTi<sub>1-y</sub>O<sub>6</sub>: yMn<sup>4+</sup>, 0.02Er<sup>3+</sup> phosphors (under 335 nm excitation)

| Mn(y) | A <sub>1</sub> | $\tau_1$ | A <sub>2</sub> | $\tau_2$ | $\tau_{av}$ (ms) |
|-------|----------------|----------|----------------|----------|------------------|
| 0.005 | 34912.354      | 0.637    | 5391.481       | 0.151    | 0.620            |
| 0.001 | 32495.059      | 0.623    | 5347.319       | 0.079    | 0.612            |
| 0.002 | 28787.434      | 0.623    | 6723.674       | 0.147    | 0.598            |
| 0.004 | 29396.155      | 0.596    | 7338.239       | 0.136    | 0.571            |
| 0.006 | 23168.134      | 0.554    | 8817.416       | 0.132    | 0.519            |
| 0.008 | 20022.614      | 0.532    | 8777.169       | 0.122    | 0.495            |
| 0.01  | 12893.303      | 0.465    | 7253.600       | 0.104    | 0.425            |
| 0.015 | 9703.535       | 0.436    | 6904.3966      | 0.090    | 0.392            |
| 0.02  | 3406.119       | 0.285    | 3804.534       | 0.051    | 0.246            |

**Table S3** Average lifetime ( $\tau$ ) of Er<sup>3+</sup> 551 nm emission and the energy transfer efficiencies ( $\eta_{ET}$ ) from Er<sup>3+</sup> to Mn<sup>4+</sup> in Gd<sub>1.98</sub>ZnTi<sub>1-y</sub>O<sub>6</sub>:yMn<sup>4+</sup>, 0.02Er<sup>3+</sup> phosphors (under 980 nm pulse laser excitation)

| Mn (y) | A <sub>1</sub> | $\tau_1$ (ms) | A <sub>2</sub> | $\tau_2$ (ms) | $\tau_{av}$ (ms) | $\eta_{ET}$ |
|--------|----------------|---------------|----------------|---------------|------------------|-------------|
| 0      | 2131.085       | 0.383         | 5571.333       | 0.080         | 0.276            | 0           |
| 0.0005 | 2016.008       | 0.326         | 5662.927       | 0.068         | 0.231            | 0.163       |
| 0.001  | 1978.692       | 0.293         | 5598.314       | 0.059         | 0.208            | 0.246       |
| 0.002  | 2103.444       | 0.208         | 5546.871       | 0.040         | 0.152            | 0.449       |
| 0.004  | 2083.221       | 0.197         | 5384.386       | 0.037         | 0.145            | 0.475       |
| 0.006  | 2232.884       | 0.134         | 5536.619       | 0.024         | 0.100            | 0.638       |
| 0.008  | 2115.080       | 0.125         | 5584.994       | 0.021         | 0.093            | 0.663       |
| 0.010  | 1910.934       | 0.091         | 5640.007       | 0.016         | 0.065            | 0.764       |
| 0.015  | 1909.984       | 0.076         | 5596.935       | 0.013         | 0.055            | 0.801       |
| 0.020  | 2083.261       | 0.018         | 5879.827       | 0.001         | 0.016            | 0.942       |
